# Supplementary material
Source: PubMed Central journal article supplement (PMC4135723)
Supplement: NIHMS584155-supplement-000067_-_Supplemental_Material.pdf [file NIHMS584155-supplement-000067_-_Supplemental_Material.pdf]

## SUPPLEMENTAL MATERIAL

**Supplementary Table 1: List of 43 independent SNPs nominally associated with BMI and their highest ENCODE ChipSeq binding score. List is sorted by meta-analysis P-value (P column)**

| rs-number                 | Position | EA | NEA | EAF  | P        | ENCODE<br>TFBS | Experiment<br>Score <sup>cj</sup> | TFBS Start<br>Position | TFBS End<br>Position |
|---------------------------|----------|----|-----|------|----------|----------------|-----------------------------------|------------------------|----------------------|
| rs186019316 <sup>a)</sup> | 611740   | A  | G   | 0.02 | 0.000494 | NRSF           | 118                               | 611562                 | 611818               |
| rs17042288 <sup>b)</sup>  | 657954   | T  | C   | 0.28 | 0.000862 | FOXA1          | 275                               | 657815                 | 658085               |
| rs6548248                 | 659544   | T  | C   | 0.29 | 0.000945 |                |                                   |                        |                      |
| rs6548245                 | 659218   | G  | A   | 0.24 | 0.00108  |                |                                   |                        |                      |
| rs12714411                | 608411   | G  | T   | 0.16 | 0.00148  |                |                                   |                        |                      |
| rs60715336                | 658149   | C  | T   | 0.29 | 0.00178  |                |                                   |                        |                      |
| rs7591067                 | 642846   | A  | G   | 0.18 | 0.00221  |                |                                   |                        |                      |
| rs73908142                | 602824   | A  | G   | 0.14 | 0.0028   | Max            | 402                               | 602678                 | 602954               |
| rs17042292                | 658157   | C  | T   | 0.29 | 0.00352  |                |                                   |                        |                      |
| rs35640204                | 681475   | C  | T   | 0.26 | 0.00419  |                |                                   |                        |                      |
| rs13007080                | 630024   | C  | A   | 0.18 | 0.00429  |                |                                   |                        |                      |
| rs35941143                | 646159   | A  | G   | 0.15 | 0.00556  |                |                                   |                        |                      |
| rs115124376               | 620455   | T  | C   | 0.01 | 0.00644  |                |                                   |                        |                      |
| rs4854339                 | 623212   | C  | T   | 0.26 | 0.00802  |                |                                   |                        |                      |
| rs11127488                | 646061   | C  | T   | 0.17 | 0.00825  |                |                                   |                        |                      |
| rs61360200                | 599281   | T  | C   | 0.14 | 0.00954  |                |                                   |                        |                      |
| rs10865551                | 641863   | A  | T   | 0.18 | 0.00969  |                |                                   |                        |                      |
| rs7567710                 | 645372   | G  | T   | 0.18 | 0.00976  |                |                                   |                        |                      |
| rs10172769                | 646345   | A  | G   | 0.17 | 0.0105   |                |                                   |                        |                      |
| rs12714413                | 642253   | C  | T   | 0.18 | 0.0121   |                |                                   |                        |                      |
| rs13027828                | 632379   | G  | T   | 0.18 | 0.0127   |                |                                   |                        |                      |
| rs188490283               | 622439   | G  | A   | 0.01 | 0.0137   |                |                                   |                        |                      |
| rs79882802                | 644356   | C  | A   | 0.16 | 0.0145   |                |                                   |                        |                      |
| rs5017301                 | 631096   | A  | G   | 0.19 | 0.0155   |                |                                   |                        |                      |
| rs4241323                 | 674297   | G  | A   | 0.16 | 0.0155   | GATA-2         | 190                               | 673982                 | 674362               |
| rs7596985                 | 659384   | G  | A   | 0.26 | 0.0156   |                |                                   |                        |                      |
| rs13387091                | 650980   | A  | G   | 0.16 | 0.0161   |                |                                   |                        |                      |
| rs7570993                 | 652565   | G  | A   | 0.12 | 0.0187   |                |                                   |                        |                      |
| rs2903489                 | 649638   | T  | C   | 0.16 | 0.0193   |                |                                   |                        |                      |
| rs76847828                | 666466   | G  | A   | 0.06 | 0.0203   |                |                                   |                        |                      |
| rs6739303                 | 628749   | T  | C   | 0.17 | 0.0205   | Pol2           | 453                               | 628694                 | 629238               |
| rs17729386                | 666343   | T  | C   | 0.30 | 0.0215   |                |                                   |                        |                      |
| rs7559447                 | 645646   | T  | C   | 0.17 | 0.0224   |                |                                   |                        |                      |
| rs11127487                | 639900   | T  | C   | 0.17 | 0.0225   |                |                                   |                        |                      |
| rs35628463                | 653581   | A  | G   | 0.17 | 0.0245   |                |                                   |                        |                      |
| rs10865550                | 641718   | G  | T   | 0.18 | 0.0246   | USF-1          | 90                                | 641590                 | 641840               |
| rs11127489                | 646081   | T  | C   | 0.17 | 0.0252   |                |                                   |                        |                      |
| rs11687052                | 623740   | G  | A   | 0.19 | 0.0288   |                |                                   |                        |                      |
| rs2867119                 | 662275   | A  | G   | 0.01 | 0.0334   |                |                                   |                        |                      |
| rs62103593                | 674054   | C  | T   | 0.14 | 0.0383   | c-Fos          | 436                               | 673942                 | 674286               |
| rs35913461                | 653575   | T  | C   | 0.17 | 0.0384   |                |                                   |                        |                      |
| rs12995666                | 629959   | C  | T   | 0.18 | 0.0408   |                |                                   |                        |                      |
| rs4241325                 | 679959   | C  | T   | 0.30 | 0.0422   |                |                                   |                        |                      |

Abbreviations: EA = effect allele, NEA = non-effect allele, EAF = Effect allele frequency, P = P-value, TBFS = transcription factor binding site

a) Variant yielded by conditional analysis on rs6548238.

b) In perfect LD with reported variant rs7596758.

c) ENCODE experiment scores have values from 0 to 1000. Higher ChipSeq binding scores indicate a higher potential evidence for transcription factor binding. In case multiple TBFS were found, only the site with the highest score was selected.

**Supplementary Table 2. Cohort specific association results and random effect results for two reported variants**

**rs7596758 (from Table2)**

**Association Result of rs7596758**

-cohort-specific results

| Cohort | SNP         | CHR | POS    | EA | Non_EA | BETA   | SE    |
|--------|-------------|-----|--------|----|--------|--------|-------|
| ARIC   | chr2:648595 | 2   | 648595 | G  | T      | 0.700  | 0.237 |
| CHS    | chr2:648595 | 2   | 648595 | G  | T      | -0.148 | 0.293 |
| FHS    | chr2:648595 | 2   | 648595 | G  | T      | 0.536  | 0.227 |

-GWAMA random effect meta-analysis

| rs_number   | EA | Non_EA | beta  | se    | beta_95L | beta_95U | z     | p-value |
|-------------|----|--------|-------|-------|----------|----------|-------|---------|
| chr2:648595 | G  | T      | 0.392 | 0.238 | -0.074   | 0.858    | 2.022 | 0.043   |

**rs186019316 (from Table 3)**

**Association Result of rs186019316 Conditional on rs6548238**

-cohort-specific results

| Cohort | SNP         | CHR | POS    | EA | Non_EA | BETA   | SE    |
|--------|-------------|-----|--------|----|--------|--------|-------|
| ARIC   | chr2:601740 | 2   | 601740 | A  | G      | -1.935 | 0.638 |
| CHS    | chr2:601740 | 2   | 601740 | A  | G      | 1.303  | 1.390 |
| FHS    | chr2:601740 | 2   | 601740 | A  | G      | -0.207 | 0.527 |

-GWAMA random effect meta-analysis

| rs_number   | EA | Non_EA | beta   | se    | beta_95L | beta_95U | z      | p-value |
|-------------|----|--------|--------|-------|----------|----------|--------|---------|
| chr2:601740 | A  | G      | -0.565 | 0.806 | -2.145   | 1.015    | -0.595 | 0.552   |

**Association Result of rs186019316 Conditional on rs2867125**

-cohort-specific results

| Cohort | SNP         | CHR | POS    | EA | Non_EA | BETA   | SE    |
|--------|-------------|-----|--------|----|--------|--------|-------|
| ARIC   | chr2:601740 | 2   | 601740 | A  | G      | -2.010 | 0.644 |
| CHS    | chr2:601740 | 2   | 601740 | A  | G      | 1.316  | 1.370 |
| FHS    | chr2:601740 | 2   | 601740 | A  | G      | -0.177 | 0.529 |

-GWAMA random effect meta-analysis

| rs_number   | EA | Non_EA | beta   | se    | beta_95L | beta_95U | z      | p-value |
|-------------|----|--------|--------|-------|----------|----------|--------|---------|
| chr2:601740 | A  | G      | -0.554 | 0.842 | -2.204   | 1.096    | -0.573 | 0.566   |

Note: the effect and SE were obtained from analysis with sampling weight adjustment
